# Supplementary material
Source: Springer Nature journal article supplement (https://www.springermedizin.de/resource/supplementary/13685_2014_31_MOESM3_ESM.pdf/9681246)
Supplement: MOESM3 [file 9681246]

### Liver MATI-II-III

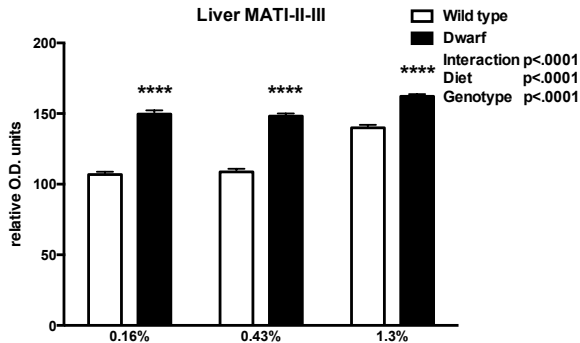

### Liver Cbs

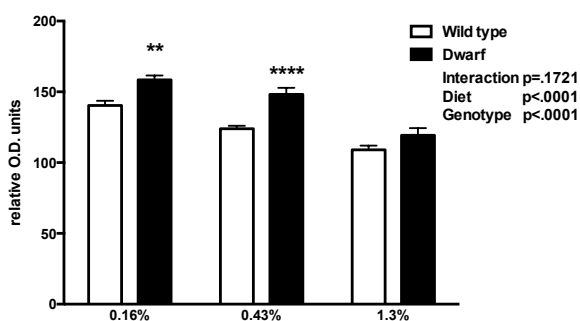

### Liver Cth

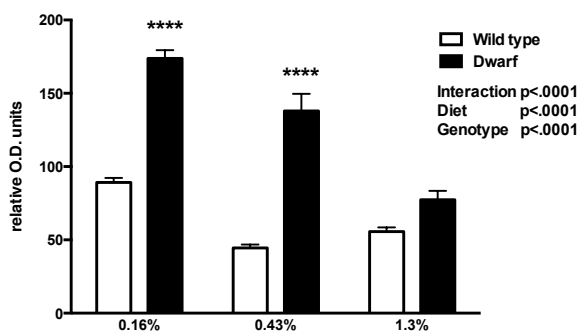

### Liver GCLM

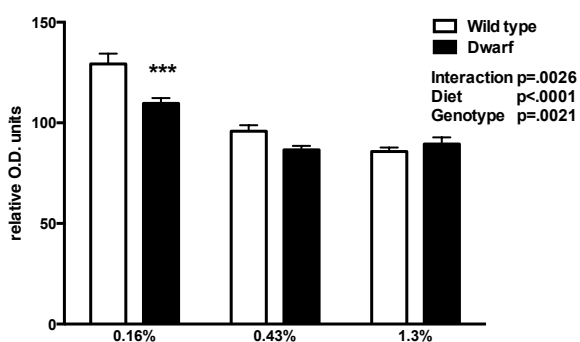

### Liver CDO

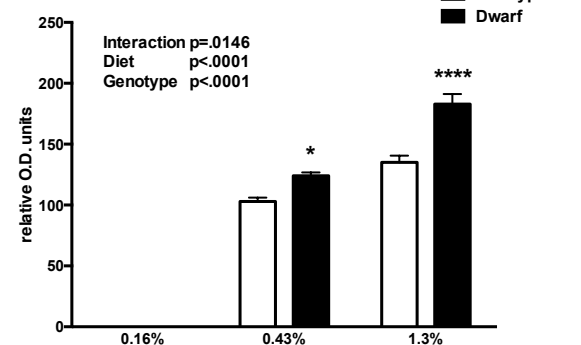

% methionine

% methionine
